# Supplementary material for: HBT-based chemosensors for the detection of fluoride through deprotonation process: experimental and DFT studies
Source: Royal Society of Chemistry journal article supplement (doi:10.1039/c4ra13532f), 2015-01-01
Supplement: c4ra13532f1.pdf [file c4ra13532f1.pdf]

## **HBT-based chemosensors for detection of fluoride through deprotonation process: experimental and DFT studies**

Shudi Liu<sup>a</sup>, Liangwei Zhang<sup>a</sup>, Panpan Zhou<sup>a</sup>, Wenyan Zan<sup>a</sup>, Xiaojun Yao<sup>a</sup>, Jingjun Yang<sup>b</sup>, Ying Yang<sup>a,b</sup> \*

E-mail address: [yangying@lzu.edu.cn](mailto:yangying@lzu.edu.cn) (Y. Yang)

Tel: 86-931-8912585; Fax: 86-931-8912582

<sup>a</sup> *Key Laboratory of Nonferrous Metals Chemistry and Resources Utilization of Gansu Province, College of Chemistry and Chemical Engineering, Lanzhou Univeristy, Lanzhou, 730000, PR China*

<sup>b</sup> *Gansu Normal University for Nationalities, Hezuo, 747000, PR China*

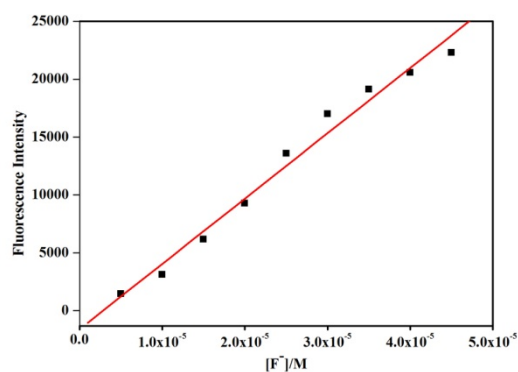

**Fig. S1** Linear fitting curve of the fluorescence intensity **L<sup>1</sup>H** versus [F<sup>-</sup>] (0 – 95 μM) at 426 nm based on the fluorescence titration files.

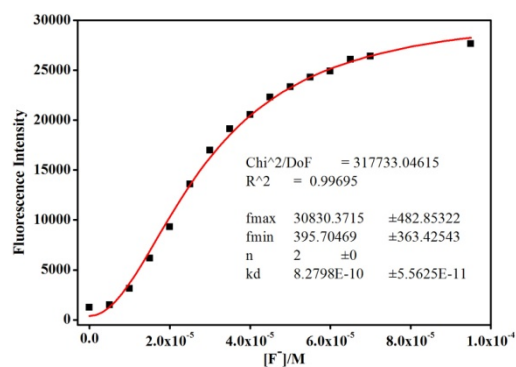

**Fig. S2** Nonlinear fitting curve of the fluorescence intensity **L<sup>1</sup>H** versus [F<sup>-</sup>] (0 – 95 μM) at 426 nm based on the fluorescence titration files.

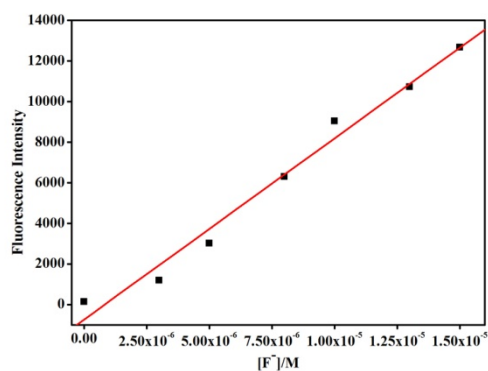

**Fig. S3** Linear fitting curve of the fluorescence intensity **L<sup>2</sup>H** versus [F<sup>-</sup>] (0 – 15 μM) at 480 nm based on the fluorescence titration files.

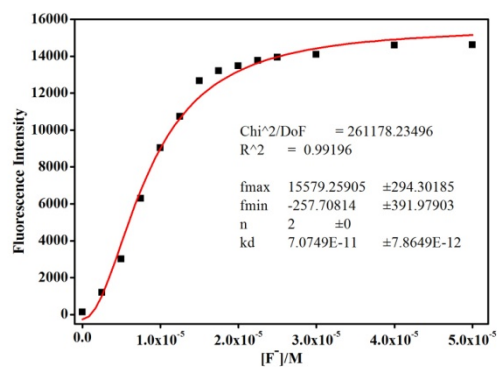

**Fig. S4** Nonlinear fitting curve of the fluorescence intensity **L<sup>2</sup>H** versus  $[F^-]$  (0 – 50  $\mu$ M) at 480 nm based on the fluorescence titration files.

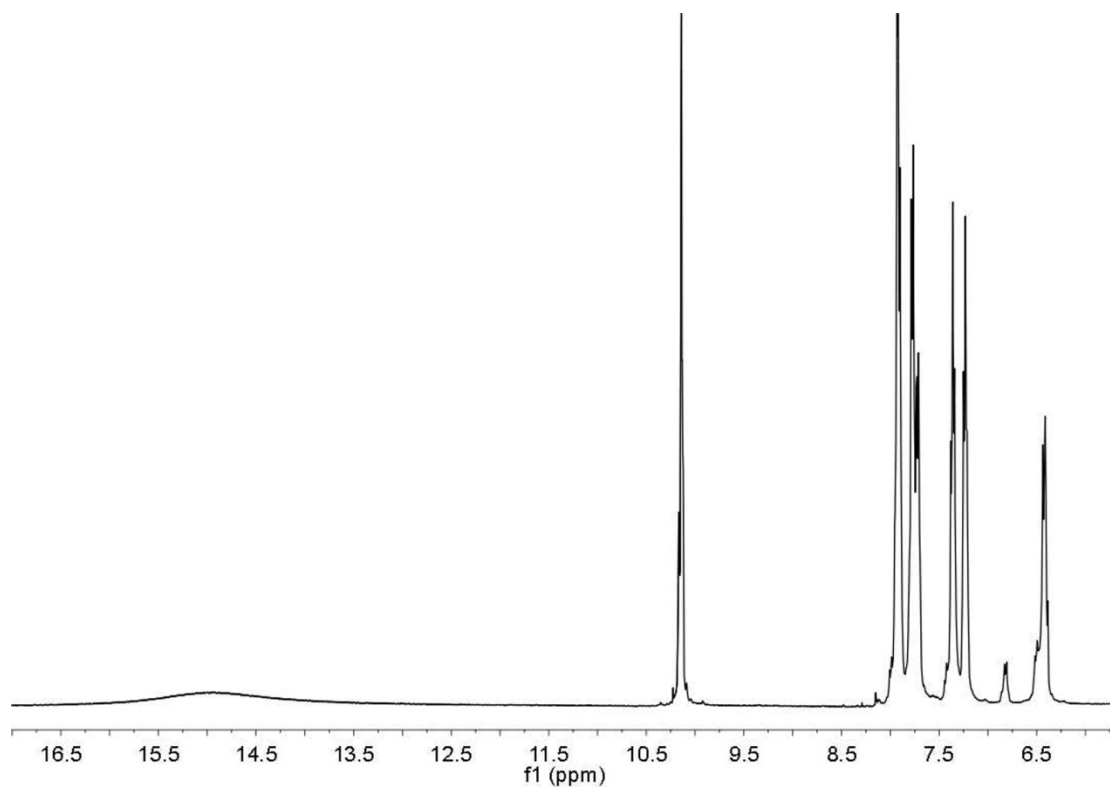

**Fig. S5** Partial <sup>1</sup>H NMR spectra of probe **L<sup>2</sup>H** in the presence of 1 equiv. of  $F^-$  in  $CDCl_3$ -THF (V/V, 2/3) mixed solvent.

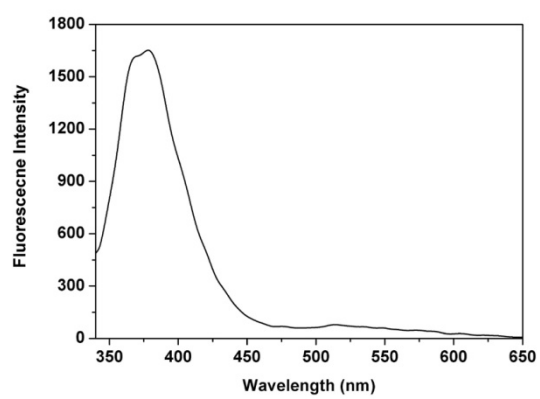

**Fig. S6** Fluorescence emission spectra of L<sup>2</sup>H (100 µM) in THF.  $\lambda_{\text{ex}} = 330$  nm.
